# Supplementary material for: Characterization of Differentially Expressed Genes under Salt Stress in Olive
Source: MDPI journal article supplement (doi:10.3390/ijms23010154), 2021-12-23

## Supplementary Material

# Characterization of differentially expressed genes under salt stress in olive

Soraya Mousavi <sup>1\*</sup>, Roberto Mariotti <sup>1</sup>, Maria Cristina Valeri <sup>1</sup>, Luca Regni <sup>2</sup>, Emanuele Lilli <sup>1</sup>, Emidio Albertini <sup>2</sup>, Primo Proietti <sup>2</sup>, Daniela Businelli <sup>2</sup>, Luciana Baldoni <sup>1</sup>

<sup>1</sup>→ Institute of Biosciences and Bioresources, National Research Council, 06128 Perugia, Italy; ✉ roberto.mariotti@ibbr.cnr.it (R.M.); mariacristinavaleri.mcv@gmail.com (M.C.V.); ✉ emanuele.lilli96@gmail.com (E.L.); luciana.baldoni@ibbr.cnr.it (L.B.) ¶

<sup>2</sup>→ Department of Agricultural, Food and Environmental Sciences, University of Perugia, 06121 Perugia, Italy; luca.regni@unipg.it (L.R.); emidio.albertini@unipg.it (E.A.); primo.proietti@unipg.it (P.P.); ✉ daniela.businelli@unipg.it (D.B.) ¶

\*→ Correspondence: soraya.mousavi@ibbr.cnr.it; Tel.: +39-075-5014813 ¶

**Table S1:** The regulatory elements predicted by Nsite program in polymorphic UTRs of upstream/downstream parts of each gene in each cultivar.

***OeNHX6* cv. Farga 5'**

|                                        |                |              |   |       |   |
|----------------------------------------|----------------|--------------|---|-------|---|
| Motifs on "-" Strand: Mean Exp. Number | 0.00737        | Up.Conf.Int. | 1 | Found | 1 |
| 27 CATGCAC                             | 21 (Mism.= 0)  |              |   |       |   |
| Motifs on "-" Strand: Mean Exp. Number | 0.00591        | Up.Conf.Int. | 1 | Found | 1 |
| 174 AACAACTCT                          | 167 (Mism.= 0) |              |   |       |   |
| Motifs on "+" Strand: Mean Exp. Number | 0.00786        | Up.Conf.Int. | 1 | Found | 1 |
| 155 CAAACaTACA                         | 164 (Mism.= 1) |              |   |       |   |
| Motifs on "-" Strand: Mean Exp. Number | 0.00069        | Up.Conf.Int. | 1 | Found | 1 |
| 101 GTTTTGGA                           | 93 (Mism.= 0)  |              |   |       |   |
| Motifs on "+" Strand: Mean Exp. Number | 0.00230        | Up.Conf.Int. | 1 | Found | 1 |
| 177 TtGAAtTTTCAG                       | 188 (Mism.= 2) |              |   |       |   |

**A total of 5 different REs were found**

***OeNHX6* var. *sylvestris* 5'**

|                                        |                |              |   |       |   |
|----------------------------------------|----------------|--------------|---|-------|---|
| Motifs on "-" Strand: Mean Exp. Number | 0.00539        | Up.Conf.Int. | 1 | Found | 1 |
| 173 AACAACTCT                          | 166 (Mism.= 0) |              |   |       |   |
| Motifs on "-" Strand: Mean Exp. Number | 0.00997        | Up.Conf.Int. | 1 | Found | 1 |
| 127 TCAACAAACaaA                       | 116 (Mism.= 2) |              |   |       |   |
| Motifs on "-" Strand: Mean Exp. Number | 0.00882        | Up.Conf.Int. | 1 | Found | 2 |
| 177 AACAAAC                            | 171 (Mism.= 0) |              |   |       |   |
| 125 AACAAAC                            | 119 (Mism.= 0) |              |   |       |   |
| Motifs on "+" Strand: Mean Exp. Number | 0.00374        | Up.Conf.Int. | 1 | Found | 1 |
| 189 CCCGGGGg                           | 196 (Mism.= 1) |              |   |       |   |
| Motifs on "-" Strand: Mean Exp. Number | 0.00366        | Up.Conf.Int. | 1 | Found | 1 |
| 31 TTCTaCAtGcCTTTTC                    | 16 (Mism.= 3)  |              |   |       |   |
| Motifs on "+" Strand: Mean Exp. Number | 0.00222        | Up.Conf.Int. | 1 | Found | 1 |
| 176 TtGAAtTTTCAG                       | 187 (Mism.= 2) |              |   |       |   |

**A total of 6 different REs were found**

***OeNHX6* cv. Farga 3'**

|                                        |                |              |   |       |   |
|----------------------------------------|----------------|--------------|---|-------|---|
| Motifs on "-" Strand: Mean Exp. Number | 0.00881        | Up.Conf.Int. | 1 | Found | 1 |
| 235 CCACTTG                            | 229 (Mism.= 0) |              |   |       |   |

Motifs on "+" Strand: Mean Exp. Number 0.00683 Up.Conf.Int. 1 Found 1  
130 AGAAACAA 137 (Mism.= 0)

Motifs on "-" Strand: Mean Exp. Number 0.00213 Up.Conf.Int. 1 Found 1  
202 ACTTcACACAC 192 (Mism.= 1)

Motifs on "-" Strand: Mean Exp. Number 0.00881 Up.Conf.Int. 1 Found 1  
235 CCACTTG 229 (Mism.= 0)

Motifs on "+" Strand: Mean Exp. Number 0.00901 Up.Conf.Int. 1 Found 1  
141 GTCAAAAT 148 (Mism.= 0)

**A total of 5 different REs were found**

***OeNHX6 var. sylvestris 3'***

Motifs on "-" Strand: Mean Exp. Number 0.00671 Up.Conf.Int. 1 Found 1  
261 TGACGTAA 254 (Mism.= 0)

Motifs on "+" Strand: Mean Exp. Number 0.00385 Up.Conf.Int. 1 Found 1  
227 ATcGaGTgGCTGTAC 241 (Mism.= 3)

Motifs on "-" Strand: Mean Exp. Number 0.00247 Up.Conf.Int. 1 Found 1  
202 ACTTcACACAC 192 (Mism.= 1)

Motifs on "+" Strand: Mean Exp. Number 0.00760 Up.Conf.Int. 1 Found 1  
141 GTCAAAAT 148 (Mism.= 0)

**A total of 4 different REs were found**

***OePI4KG cv. Farga 5'***

Motifs on "-" Strand: Mean Exp. Number 0.00704 Up.Conf.Int. 1 Found 1  
209 TCtACGTCTC 200 (Mism.= 1)

Motifs on "+" Strand: Mean Exp. Number 0.00771 Up.Conf.Int. 1 Found 1  
200 GAgACGTAGA 209 (Mism.= 1)

Motifs on "+" Strand: Mean Exp. Number 0.00932 Up.Conf.Int. 1 Found 1  
380 AgaATTGATTGAG 392 (Mism.= 2)

Motifs on "+" Strand: Mean Exp. Number 0.00999 Up.Conf.Int. 1 Found 1  
15 TCAACGTGTC 24 (Mism.= 0)

Motifs on "+" Strand: Mean Exp. Number 0.00186 Up.Conf.Int. 1 Found 1  
68 CTCCAACcAAaCC 80 (Mism.= 2)

Motifs on "-" Strand: Mean Exp. Number 0.00756 Up.Conf.Int. 1 Found 1

566 AAACCCTAA 558 (Mism.= 0)

Motifs on "+" Strand: Mean Exp. Number 0.00756 Up.Conf.Int. 1 Found 1  
558 TTAGGGTTT 566 (Mism.= 0)

Motifs on "+" Strand: Mean Exp. Number 0.00084 Up.Conf.Int. 1 Found 1  
71 CAACCAAACCAgT 84 (Mism.= 2)

Motifs on "-" Strand: Mean Exp. Number 0.00578 Up.Conf.Int. 1 Found 5  
110 AGAGAGAGA 102 (Mism.= 0)  
108 AGAGAGAGA 100 (Mism.= 0)  
106 AGAGAGAGA 98 (Mism.= 0)  
104 AGAGAGAGA 96 (Mism.= 0)  
102 AGAGAGAGA 94 (Mism.= 0)

Motifs on "+" Strand: Mean Exp. Number 0.00817 Up.Conf.Int. 1 Found 1  
65 ctTCTCCAACCA 76 (Mism.= 2)

Motifs on "+" Strand: Mean Exp. Number 0.00533 Up.Conf.Int. 1 Found 1  
109 CtAACGTACA 118 (Mism.= 1)

Motifs on "+" Strand: Mean Exp. Number 0.00160 Up.Conf.Int. 1 Found 1  
414 GAGGGTATTTTgGTcA 429 (Mism.= 2)

Motifs on "-" Strand: Mean Exp. Number 0.00246 Up.Conf.Int. 1 Found 4  
113 GttAGAGAGAGAGAGAg 97 (Mism.= 3)  
111 tAGAGAGAGAGAGAGAg 95 (Mism.= 2)  
109 GAGAGAGAGAGAGAGAA 93 (Mism.= 0)  
107 GAGAGAGAGAGAGAAaAA 91 (Mism.= 1)

Motifs on "-" Strand: Mean Exp. Number 0.00863 Up.Conf.Int. 1 Found 1  
393 TCTCAATC 386 (Mism.= 0)

Motifs on "-" Strand: Mean Exp. Number 0.00556 Up.Conf.Int. 1 Found 1  
586 TTTTCCAC 579 (Mism.= 0)

Motifs on "-" Strand: Mean Exp. Number 0.00622 Up.Conf.Int. 1 Found 1  
501 GCCATGTGAt 492 (Mism.= 1)

Motifs on "-" Strand: Mean Exp. Number 0.00773 Up.Conf.Int. 1 Found 1  
517 tTACTCTACaC 507 (Mism.= 2)

Motifs on "-" Strand: Mean Exp. Number 0.00951 Up.Conf.Int. 1 Found 1  
213 TtACTCTACGt 203 (Mism.= 2)

Motifs on "-" Strand: Mean Exp. Number 0.00209 Up.Conf.Int. 1 Found 1  
129 TTTCTTGTCT 119 (Mism.= 1)

Motifs on "-" Strand: Mean Exp. Number 0.00247 Up.Conf.Int. 1 Found 1  
201 TCGTGTGC 194 (Mism.= 0)

Motifs on "+" Strand: Mean Exp. Number 0.00601 Up.Conf.Int. 1 Found 7

|    |                  |                |
|----|------------------|----------------|
| 87 | CTCatTtTCTCTCTCT | 102 (Mism.= 3) |
| 89 | CatTtTCTCTCTCTCT | 104 (Mism.= 3) |
| 91 | tTtTCTCTCTCTCTCT | 106 (Mism.= 2) |
| 93 | tTCTCTCTCTCTCTCT | 108 (Mism.= 1) |
| 95 | CTCTCTCTCTCTCTCT | 110 (Mism.= 0) |
| 97 | CTCTCTCTCTCTCTaa | 112 (Mism.= 2) |
| 99 | CTCTCTCTCTCTaaCg | 114 (Mism.= 3) |

Motifs on "+" Strand: Mean Exp. Number 0.00366 Up.Conf.Int. 1 Found 1

|    |              |               |
|----|--------------|---------------|
| 14 | TTCAACGTGtCt | 25 (Mism.= 2) |
|----|--------------|---------------|

**A total of 22 different REs were found**

***OePI4KG* cv. Leccino 5'**

Motifs on "-" Strand: Mean Exp. Number 0.00684 Up.Conf.Int. 1 Found 1

|     |            |                |
|-----|------------|----------------|
| 211 | TCtACGTCTC | 202 (Mism.= 1) |
|-----|------------|----------------|

Motifs on "+" Strand: Mean Exp. Number 0.00750 Up.Conf.Int. 1 Found 1

|     |            |                |
|-----|------------|----------------|
| 202 | GAgACGTAGA | 211 (Mism.= 1) |
|-----|------------|----------------|

Motifs on "+" Strand: Mean Exp. Number 0.00906 Up.Conf.Int. 1 Found 1

|     |               |                |
|-----|---------------|----------------|
| 382 | AgaATTGATTGAG | 394 (Mism.= 2) |
|-----|---------------|----------------|

Motifs on "+" Strand: Mean Exp. Number 0.00051 Up.Conf.Int. 1 Found 1

|    |            |               |
|----|------------|---------------|
| 15 | TCAACGTGTC | 24 (Mism.= 0) |
|----|------------|---------------|

Motifs on "+" Strand: Mean Exp. Number 0.00185 Up.Conf.Int. 1 Found 1

|    |               |               |
|----|---------------|---------------|
| 68 | CTCCAACcAAaCC | 80 (Mism.= 2) |
|----|---------------|---------------|

Motifs on "-" Strand: Mean Exp. Number 0.00765 Up.Conf.Int. 1 Found 1

|     |           |                |
|-----|-----------|----------------|
| 568 | AAACCCTAA | 560 (Mism.= 0) |
|-----|-----------|----------------|

Motifs on "+" Strand: Mean Exp. Number 0.00765 Up.Conf.Int. 1 Found 1

|     |           |                |
|-----|-----------|----------------|
| 560 | TTAGGGTTT | 568 (Mism.= 0) |
|-----|-----------|----------------|

Motifs on "+" Strand: Mean Exp. Number 0.00083 Up.Conf.Int. 1 Found 1

|    |                |               |
|----|----------------|---------------|
| 71 | CAACCAAACCAagT | 84 (Mism.= 2) |
|----|----------------|---------------|

Motifs on "-" Strand: Mean Exp. Number 0.00609 Up.Conf.Int. 1 Found 6

|     |           |                |
|-----|-----------|----------------|
| 112 | AGAGAGAGA | 104 (Mism.= 0) |
| 110 | AGAGAGAGA | 102 (Mism.= 0) |
| 108 | AGAGAGAGA | 100 (Mism.= 0) |
| 106 | AGAGAGAGA | 98 (Mism.= 0)  |
| 104 | AGAGAGAGA | 96 (Mism.= 0)  |
| 102 | AGAGAGAGA | 94 (Mism.= 0)  |

Motifs on "+" Strand: Mean Exp. Number 0.00813 Up.Conf.Int. 1 Found 1

|    |              |               |
|----|--------------|---------------|
| 65 | ctTCTCCAACCA | 76 (Mism.= 2) |
|----|--------------|---------------|

Motifs on "+" Strand: Mean Exp. Number 0.00519 Up.Conf.Int. 1 Found 1  
 111 CtAACGTACA 120 (Mism.= 1)

Motifs on "+" Strand: Mean Exp. Number 0.00158 Up.Conf.Int. 1 Found 1  
 416 GAGGGTATTTTgGTcA 431 (Mism.= 2)

Motifs on "-" Strand: Mean Exp. Number 0.00265 Up.Conf.Int. 1 Found 5  
 115 GttAGAGAGAGAGAGAg 99 (Mism.= 3)  
 113 tAGAGAGAGAGAGAGAg 97 (Mism.= 2)  
 111 GAGAGAGAGAGAGAGAg 95 (Mism.= 1)  
 109 GAGAGAGAGAGAGAGAA 93 (Mism.= 0)  
 107 GAGAGAGAGAGAGAAaAA 91 (Mism.= 1)

Motifs on "-" Strand: Mean Exp. Number 0.00841 Up.Conf.Int. 1 Found 1  
 395 TCTCAATC 388 (Mism.= 0)

Motifs on "-" Strand: Mean Exp. Number 0.00532 Up.Conf.Int. 1 Found 1  
 588 TTTTCCAC 581 (Mism.= 0)

Motifs on "-" Strand: Mean Exp. Number 0.00622 Up.Conf.Int. 1 Found 1  
 503 GCCATGTGAt 494 (Mism.= 1)

Motifs on "-" Strand: Mean Exp. Number 0.00752 Up.Conf.Int. 1 Found 1  
 519 tTACTCTACaC 509 (Mism.= 2)

Motifs on "-" Strand: Mean Exp. Number 0.00936 Up.Conf.Int. 1 Found 1  
 215 TtACTCTACGt 205 (Mism.= 2)

Motifs on "-" Strand: Mean Exp. Number 0.00196 Up.Conf.Int. 1 Found 1  
 131 TTTCTTGTTCT 121 (Mism.= 1)

Motifs on "-" Strand: Mean Exp. Number 0.00242 Up.Conf.Int. 1 Found 1  
 203 TCGTGTGC 196 (Mism.= 0)

Motifs on "+" Strand: Mean Exp. Number 0.00644 Up.Conf.Int. 1 Found 8  
 87 CTCatTtTCTCTCTCT 102 (Mism.= 3)  
 89 CatTtTCTCTCTCTCT 104 (Mism.= 3)  
 91 tTtTCTCTCTCTCTCT 106 (Mism.= 2)  
 93 tTCTCTCTCTCTCTCT 108 (Mism.= 1)  
 95 CTCTCTCTCTCTCTCT 110 (Mism.= 0)  
 97 CTCTCTCTCTCTCTCT 112 (Mism.= 0)  
 99 CTCTCTCTCTCTCTaa 114 (Mism.= 2)  
 101 CTCTCTCTCTCTaaCg 116 (Mism.= 3)

Motifs on "+" Strand: Mean Exp. Number 0.00364 Up.Conf.Int. 1 Found 1  
 14 TTCAACGTGtCt 25 (Mism.= 2)

**A total of 22 different REs were found**

***OePIK4g* cv. Picual 5'**

|                                        |                |              |   |       |   |
|----------------------------------------|----------------|--------------|---|-------|---|
| Motifs on "-" Strand: Mean Exp. Number | 0.00705        | Up.Conf.Int. | 1 | Found | 1 |
| 211 TctACGTCTC                         | 202 (Mism.= 1) |              |   |       |   |
| Motifs on "+" Strand: Mean Exp. Number | 0.00762        | Up.Conf.Int. | 1 | Found | 1 |
| 202 GAgACGTAGA                         | 211 (Mism.= 1) |              |   |       |   |
| Motifs on "+" Strand: Mean Exp. Number | 0.00915        | Up.Conf.Int. | 1 | Found | 1 |
| 382 AgaATTGATTGAG                      | 394 (Mism.= 2) |              |   |       |   |
| Motifs on "+" Strand: Mean Exp. Number | 0.00051        | Up.Conf.Int. | 1 | Found | 1 |
| 15 TCAACGTGTC                          | 24 (Mism.= 0)  |              |   |       |   |
| Motifs on "+" Strand: Mean Exp. Number | 0.00184        | Up.Conf.Int. | 1 | Found | 1 |
| 68 CTCCAACcAAaCC                       | 80 (Mism.= 2)  |              |   |       |   |
| Motifs on "-" Strand: Mean Exp. Number | 0.00766        | Up.Conf.Int. | 1 | Found | 1 |
| 568 AAACCCTAA                          | 560 (Mism.= 0) |              |   |       |   |
| Motifs on "+" Strand: Mean Exp. Number | 0.00766        | Up.Conf.Int. | 1 | Found | 1 |
| 560 TTAGGGTTT                          | 568 (Mism.= 0) |              |   |       |   |
| Motifs on "+" Strand: Mean Exp. Number | 0.00082        | Up.Conf.Int. | 1 | Found | 1 |
| 71 CAACCAAACCAagT                      | 84 (Mism.= 2)  |              |   |       |   |
| Motifs on "-" Strand: Mean Exp. Number | 0.00595        | Up.Conf.Int. | 1 | Found | 6 |
| 112 AGAGAGAGA                          | 104 (Mism.= 0) |              |   |       |   |
| 110 AGAGAGAGA                          | 102 (Mism.= 0) |              |   |       |   |
| 108 AGAGAGAGA                          | 100 (Mism.= 0) |              |   |       |   |
| 106 AGAGAGAGA                          | 98 (Mism.= 0)  |              |   |       |   |
| 104 AGAGAGAGA                          | 96 (Mism.= 0)  |              |   |       |   |
| 102 AGAGAGAGA                          | 94 (Mism.= 0)  |              |   |       |   |
| Motifs on "+" Strand: Mean Exp. Number | 0.00824        | Up.Conf.Int. | 1 | Found | 1 |
| 111 CtAACGTACA                         | 120 (Mism.= 1) |              |   |       |   |
| Motifs on "+" Strand: Mean Exp. Number | 0.00807        | Up.Conf.Int. | 1 | Found | 1 |
| 65 ctTCTCCAACCA                        | 76 (Mism.= 2)  |              |   |       |   |
| Motifs on "+" Strand: Mean Exp. Number | 0.00521        | Up.Conf.Int. | 1 | Found | 1 |
| 111 CtAACGTACA                         | 120 (Mism.= 1) |              |   |       |   |
| Motifs on "+" Strand: Mean Exp. Number | 0.00160        | Up.Conf.Int. | 1 | Found | 1 |
| 416 GAGGGTATTTTgGTcA                   | 431 (Mism.= 2) |              |   |       |   |
| Motifs on "-" Strand: Mean Exp. Number | 0.00257        | Up.Conf.Int. | 1 | Found | 5 |
| 115 GttAGAGAGAGAGAGAg                  | 99 (Mism.= 3)  |              |   |       |   |
| 113 tAGAGAGAGAGAGAGAg                  | 97 (Mism.= 2)  |              |   |       |   |
| 111 GAGAGAGAGAGAGAGAg                  | 95 (Mism.= 1)  |              |   |       |   |
| 109 GAGAGAGAGAGAGAGAA                  | 93 (Mism.= 0)  |              |   |       |   |

|                                                                       |                    |                |  |  |  |
|-----------------------------------------------------------------------|--------------------|----------------|--|--|--|
| 107                                                                   | GAGAGAGAGAGAGAA    | 91 (Mism.= 1)  |  |  |  |
| Motifs on "-" Strand: Mean Exp. Number 0.00853 Up.Conf.Int. 1 Found 1 |                    |                |  |  |  |
| 395                                                                   | TCTCAATC           | 388 (Mism.= 0) |  |  |  |
| Motifs on "-" Strand: Mean Exp. Number 0.00543 Up.Conf.Int. 1 Found 1 |                    |                |  |  |  |
| 588                                                                   | TTTTCCAC           | 581 (Mism.= 0) |  |  |  |
| Motifs on "-" Strand: Mean Exp. Number 0.00629 Up.Conf.Int. 1 Found 1 |                    |                |  |  |  |
| 503                                                                   | GCCATGTGAt         | 494 (Mism.= 1) |  |  |  |
| Motifs on "-" Strand: Mean Exp. Number 0.00769 Up.Conf.Int. 1 Found 1 |                    |                |  |  |  |
| 519                                                                   | tTACTCTACaC        | 509 (Mism.= 2) |  |  |  |
| Motifs on "-" Strand: Mean Exp. Number 0.00951 Up.Conf.Int. 1 Found 1 |                    |                |  |  |  |
| 215                                                                   | TtACTCTACGt        | 205 (Mism.= 2) |  |  |  |
| Motifs on "-" Strand: Mean Exp. Number 0.00198 Up.Conf.Int. 1 Found 1 |                    |                |  |  |  |
| 131                                                                   | TTTCTTGTCT         | 121 (Mism.= 1) |  |  |  |
| Motifs on "-" Strand: Mean Exp. Number 0.00246 Up.Conf.Int. 1 Found 1 |                    |                |  |  |  |
| 203                                                                   | TCGTGTGC           | 196 (Mism.= 0) |  |  |  |
| Motifs on "+" Strand: Mean Exp. Number 0.00626 Up.Conf.Int. 1 Found 8 |                    |                |  |  |  |
| 87                                                                    | CTCatTtTCTCTCTCT   | 102 (Mism.= 3) |  |  |  |
| 89                                                                    | CatTtTCTCTCTCTCT   | 104 (Mism.= 3) |  |  |  |
| 91                                                                    | tTtTCTCTCTCTCTCT   | 106 (Mism.= 2) |  |  |  |
| 93                                                                    | tTCTCTCTCTCTCTCT   | 108 (Mism.= 1) |  |  |  |
| 95                                                                    | CTCTCTCTCTCTCTCT   | 110 (Mism.= 0) |  |  |  |
| 97                                                                    | CTCTCTCTCTCTCTCT   | 112 (Mism.= 0) |  |  |  |
| 99                                                                    | CTCTCTCTCTCTCTaa   | 114 (Mism.= 2) |  |  |  |
| 101                                                                   | CTCTCTCTCTCTCTaaCg | 116 (Mism.= 3) |  |  |  |
| Motifs on "+" Strand: Mean Exp. Number 0.00369 Up.Conf.Int. 1 Found 1 |                    |                |  |  |  |
| 14                                                                    | TTCAACGTGtCt       | 25 (Mism.= 2)  |  |  |  |

**A total of 23 different REs were found**

#### ***OePI4KG cv. Farga 3'***

|                                                                       |              |                 |  |  |  |
|-----------------------------------------------------------------------|--------------|-----------------|--|--|--|
| Motifs on "+" Strand: Mean Exp. Number 0.00381 Up.Conf.Int. 1 Found 1 |              |                 |  |  |  |
| 295                                                                   | TAGTGCTGT    | 303 (Mism.= 0)  |  |  |  |
| Motifs on "-" Strand: Mean Exp. Number 0.00617 Up.Conf.Int. 1 Found 1 |              |                 |  |  |  |
| 821                                                                   | TCCGTGTAAaCA | 811 (Mism.= 1)  |  |  |  |
| Motifs on "-" Strand: Mean Exp. Number 0.00229 Up.Conf.Int. 1 Found 1 |              |                 |  |  |  |
| 1102                                                                  | CCATTGTTTCGG | 1091 (Mism.= 1) |  |  |  |
| Motifs on "+" Strand: Mean Exp. Number 0.00051 Up.Conf.Int. 1 Found 1 |              |                 |  |  |  |



765 TgCACGTGcCACC 777 (Mism.= 2)

Motifs on "+" Strand: Mean Exp. Number 0.00584 Up.Conf.Int. 1 Found 1  
766 GCACGTGC 773 (Mism.= 0)

Motifs on "-" Strand: Mean Exp. Number 0.00584 Up.Conf.Int. 1 Found 1  
773 GCACGTGC 766 (Mism.= 0)

Motifs on "-" Strand: Mean Exp. Number 0.00189 Up.Conf.Int. 1 Found 1  
640 TtGAAGTTTCAG 629 (Mism.= 1)

**A total of 7 different REs were found**

***OePIK4g* cv. Leccino 3'**

Motifs on "+" Strand: Mean Exp. Number 0.00366 Up.Conf.Int. 1 Found 1  
295 TAGTGCTGT 303 (Mism.= 0)

Motifs on "-" Strand: Mean Exp. Number 0.00600 Up.Conf.Int. 1 Found 1  
805 TCCGTGTAAcA 795 (Mism.= 1)

Motifs on "-" Strand: Mean Exp. Number 0.00229 Up.Conf.Int. 1 Found 1  
1086 CCATTGTTTCGG 1075 (Mism.= 1)

Motifs on "-" Strand: Mean Exp. Number 0.00191 Up.Conf.Int. 1 Found 1  
640 TtGAAGTTTCAG 629 (Mism.= 1)

**A total of 4 different REs were found**

***OePIK4g* cv. Picual 3'**

Motifs on "+" Strand: Mean Exp. Number 0.00372 Up.Conf.Int. 1 Found 1  
295 TAGTGCTGT 303 (Mism.= 0)

Motifs on "-" Strand: Mean Exp. Number 0.00614 Up.Conf.Int. 1 Found 1  
821 TCCGTGTAAcA 811 (Mism.= 1)

Motifs on "-" Strand: Mean Exp. Number 0.00234 Up.Conf.Int. 1 Found 1  
1102 CCATTGTTTCGG 1091 (Mism.= 1)

Motifs on "+" Strand: Mean Exp. Number 0.00052 Up.Conf.Int. 1 Found 1  
765 TgCACGTGcCACC 777 (Mism.= 2)

Motifs on "+" Strand: Mean Exp. Number 0.00583 Up.Conf.Int. 1 Found 1  
766 GCACGTGC 773 (Mism.= 0)

Motifs on "-" Strand: Mean Exp. Number 0.00583 Up.Conf.Int. 1 Found 1  
773 GCACGTGC 766 (Mism.= 0)

Motifs on "-" Strand: Mean Exp. Number 0.00191 Up.Conf.Int. 1 Found 1  
640 TtGAAGTTTCAG 629 (Mism.= 1)

**A total of 7 different REs were found**

***OeBBX19* cv. Farga 5'**

Motifs on "+" Strand: Mean Exp. Number 0.00526 Up.Conf.Int. 1 Found 1  
83 CTTTTGatTACCTTA 97 (Mism.= 2)

Motifs on "+" Strand: Mean Exp. Number 0.00295 Up.Conf.Int. 1 Found 1  
35 gCATAAT 41 --23-- 65 ATTATAT 71 (Mism.= 1/ 0)

Motifs on "-" Strand: Mean Exp. Number 0.00680 Up.Conf.Int. 1 Found 1  
115 GGTAATTA 108 (Mism.= 0)

Motifs on "-" Strand: Mean Exp. Number 0.00787 Up.Conf.Int. 1 Found 1  
60 AgAACCATCCAc 49 (Mism.= 2)

Motifs on "+" Strand: Mean Exp. Number 0.00242 Up.Conf.Int. 1 Found 1  
146 TAATTGGAAaAAA 157 (Mism.= 1)

Motifs on "-" Strand: Mean Exp. Number 0.00602 Up.Conf.Int. 1 Found 1  
165 ATTACGTaTT 156 (Mism.= 1)

**A total of 6 different REs were found**

***OeBBX19* cv. Leccino 5'**

Motifs on "+" Strand: Mean Exp. Number 0.00557 Up.Conf.Int. 1 Found 1  
83 CTTTTGatTACCTTA 97 (Mism.= 2)

Motifs on "+" Strand: Mean Exp. Number 0.00306 Up.Conf.Int. 1 Found 1  
35 ACtTAAT 41 --23-- 65 ATTATAT 71 (Mism.= 1/ 0)

Motifs on "-" Strand: Mean Exp. Number 0.00738 Up.Conf.Int. 1 Found 1  
113 GGTAATTA 106 (Mism.= 0)

Motifs on "-" Strand: Mean Exp. Number 0.00474 Up.Conf.Int. 1 Found 1  
164 AATGACGTaTTT 152 (Mism.= 2)

Motifs on "+" Strand: Mean Exp. Number 0.00643 Up.Conf.Int. 1 Found 1  
26 CAAACGgACA 35 (Mism.= 1)

Motifs on "-" Strand: Mean Exp. Number 0.00692 Up.Conf.Int. 1 Found 1  
60 AgAACCATCCAc 49 (Mism.= 2)

Motifs on "+" Strand: Mean Exp. Number 0.00223 Up.Conf.Int. 1 Found 1  
144 TAATTGGAAaAAA 155 (Mism.= 1)

Motifs on "-" Strand: Mean Exp. Number 0.00041 Up.Conf.Int. 1 Found 1  
166 TTaATGACGTAtTT 153 (Mism.= 2)

Motifs on "-" Strand: Mean Exp. Number 0.00236 Up.Conf.Int. 1 Found 1  
164 aATGACGTATTt 153 (Mism.= 2)

Motifs on "+" Strand: Mean Exp. Number 0.00780 Up.Conf.Int. 1 Found 1  
155 aTACGTCATTaA 166 (Mism.= 2)

**A total of 10 different REs were found**

***OeBBX19* cv. Farga 3'**

Motifs on "-" Strand: Mean Exp. Number 0.00870 Up.Conf.Int. 1 Found 1  
142 aACAGTGTTAa 132 (Mism.= 2)

Motifs on "+" Strand: Mean Exp. Number 0.00307 Up.Conf.Int. 1 Found 1  
99 cAcCTGACCTTT 110 (Mism.= 2)

Motifs on "-" Strand: Mean Exp. Number 0.00342 Up.Conf.Int. 1 Found 1  
94 CGATTTAAGG 85 (Mism.= 1)

**A total of 3 different REs were found**

***OeBBX19* cv. Leccino 3'**

Motifs on "-" Strand: Mean Exp. Number 0.00896 Up.Conf.Int. 1 Found 1  
142 aACAGTGTTAa 132 (Mism.= 2)

Motifs on "+" Strand: Mean Exp. Number 0.00308 Up.Conf.Int. 1 Found 1  
99 cAcCTGACCTTT 110 (Mism.= 2)

Motifs on "-" Strand: Mean Exp. Number 0.00949 Up.Conf.Int. 1 Found 1  
97 CAATgATTT 89 (Mism.= 1)

**A total of 3 different REs were found**

***OeRD19A* cv. Farga 3'**

Motifs on "-" Strand: Mean Exp. Number 0.00527 Up.Conf.Int. 1 Found 1  
28 GGaAATTA 21 (Mism.= 1)

Motifs on "+" Strand: Mean Exp. Number 0.00984 Up.Conf.Int. 1 Found 1  
19 aATAATTT 26 (Mism.= 1)

**A total of 2 different REs were found**

### ***OeRD19A* cv. Leccino 3'**

Motifs on "-" Strand: Mean Exp. Number 0.00412 Up.Conf.Int. 1 Found 1  
28 GGaAATTA 21 (Mism.= 1)

Motifs on "-" Strand: Mean Exp. Number 0.00801 Up.Conf.Int. 1 Found 1  
26 aAATTATTT 18 (Mism.= 1)

Motifs on "+" Strand: Mean Exp. Number 0.00765 Up.Conf.Int. 1 Found 1  
19 aATAATTT 26 (Mism.= 1)

**A total of 3 different REs were found**

### ***OePIP1.1* cv. Farga 5'**

Motifs on "+" Strand: Mean Exp. Number 0.00478 Up.Conf.Int. 1 Found 1  
50 ATAtAAATCAA 60 (Mism.= 1)

Motifs on "-" Strand: Mean Exp. Number 0.00268 Up.Conf.Int. 1 Found 1  
151 CTCACACT 144 (Mism.= 0)

Motifs on "+" Strand: Mean Exp. Number 0.00170 Up.Conf.Int. 1 Found 1  
150 AGAAAGAGA 158 (Mism.= 0)

Motifs on "-" Strand: Mean Exp. Number 0.00418 Up.Conf.Int. 1 Found 1  
72 AAGCGgAAGT 63 (Mism.= 1)

Motifs on "-" Strand: Mean Exp. Number 0.00534 Up.Conf.Int. 1 Found 1  
145 CTAAACAAG 136 (Mism.= 1)

**A total of 5 different REs were found**

### ***OePIP1.1* cv. Leccino 5'**

Motifs on "+" Strand: Mean Exp. Number 0.00530 Up.Conf.Int. 1 Found 1  
50 ATAtAAATCAA 60 (Mism.= 1)

Motifs on "-" Strand: Mean Exp. Number 0.00291 Up.Conf.Int. 1 Found 1  
151 CTCACACT 144 (Mism.= 0)

Motifs on "+" Strand: Mean Exp. Number 0.00190 Up.Conf.Int. 1 Found 1  
150 AGAAAGAGA 158 (Mism.= 0)

Motifs on "-" Strand: Mean Exp. Number 0.00394 Up.Conf.Int. 1 Found 1  
72 AAGCGaAAGT 63 (Mism.= 1)

Motifs on "-" Strand: Mean Exp. Number 0.00801 Up.Conf.Int. 1 Found 1  
89 TGTGATG 83 (Mism.= 0)

Motifs on "-" Strand: Mean Exp. Number 0.00576 Up.Conf.Int. 1 Found 1  
145 CTAAAACAAG 136 (Mism.= 1)

**A total of 6 different REs were found**

***OePIP1.1* cv. Picual 5'**

Motifs on "+" Strand: Mean Exp. Number 0.00435 Up.Conf.Int. 1 Found 1  
50 ATAtAAATCAA 60 (Mism.= 1)

Motifs on "-" Strand: Mean Exp. Number 0.00258 Up.Conf.Int. 1 Found 1  
151 CTCACACT 144 (Mism.= 0)

Motifs on "+" Strand: Mean Exp. Number 0.00151 Up.Conf.Int. 1 Found 1  
150 AGAAAGAGA 158 (Mism.= 0)

Motifs on "-" Strand: Mean Exp. Number 0.00438 Up.Conf.Int. 1 Found 1  
72 AAGCGgAAGT 63 (Mism.= 1)

Motifs on "-" Strand: Mean Exp. Number 0.00543 Up.Conf.Int. 1 Found 1  
145 CTAAAACAAG 136 (Mism.= 1)

**A total of 5 different REs were found**

***OePIP1.1* cv. Farga 3'**

Motifs on "+" Strand: Mean Exp. Number 0.00408 Up.Conf.Int. 1 Found 1  
202 AAAGTGGGGaCt 213 (Mism.= 2)

Motifs on "-" Strand: Mean Exp. Number 0.00483 Up.Conf.Int. 1 Found 1  
131 TgTCACCAtCTA 120 (Mism.= 2)

Motifs on "-" Strand: Mean Exp. Number 0.00931 Up.Conf.Int. 1 Found 1  
145 CTTTTCTAAG 136 (Mism.= 1)

Motifs on "+" Strand: Mean Exp. Number 0.00251 Up.Conf.Int. 1 Found 1  
148 CtGAAC TTCAA 159 (Mism.= 1)

Motifs on "+" Strand: Mean Exp. Number 0.00564 Up.Conf.Int. 1 Found 1  
44 AGCCCAT 50 (Mism.= 0)

**A total of 5 different REs were found**

***OePIP1.1* cv. Leccino 3'**

Motifs on "+" Strand: Mean Exp. Number 0.00409 Up.Conf.Int. 1 Found 1  
202 AAAGTGGGGaCt 213 (Mism.= 2)

Motifs on "-" Strand: Mean Exp. Number 0.00508 Up.Conf.Int. 1 Found 1  
131 TgTCACCAtCTA 120 (Mism.= 2)

Motifs on "-" Strand: Mean Exp. Number 0.00874 Up.Conf.Int. 1 Found 1  
145 CTTTTCTAAG 136 (Mism.= 1)

Motifs on "+" Strand: Mean Exp. Number 0.00365 Up.Conf.Int. 1 Found 1  
1 gCGATGACATTa 12 (Mism.= 2)

Motifs on "+" Strand: Mean Exp. Number 0.00246 Up.Conf.Int. 1 Found 1  
148 CtGAACTTTCAA 159 (Mism.= 1)

Motifs on "-" Strand: Mean Exp. Number 0.00923 Up.Conf.Int. 1 Found 1  
14 TTAAATGT 7 (Mism.= 0)

Motifs on "+" Strand: Mean Exp. Number 0.00546 Up.Conf.Int. 1 Found 1  
44 AGCCCAT 50 (Mism.= 0)

**A total of 7 different REs were found**

***OeSRP cv. Farga 5'***

Motifs on "-" Strand: Mean Exp. Number 0.00432 Up.Conf.Int. 1 Found 1  
20 CATGCAA 14 (Mism.= 0)

Motifs on "-" Strand: Mean Exp. Number 0.00894 Up.Conf.Int. 1 Found 1  
51 TCCGTGTtCA 41 (Mism.= 2)

Motifs on "-" Strand: Mean Exp. Number 0.00283 Up.Conf.Int. 1 Found 1  
194 TTTTtagTGGGTTTTT 179 (Mism.= 3)

Motifs on "+" Strand: Mean Exp. Number 0.00573 Up.Conf.Int. 1 Found 1  
3 CCAAATTTG 12 (Mism.= 1)

Motifs on "+" Strand: Mean Exp. Number 0.00191 Up.Conf.Int. 1 Found 1  
3 CCAAATTTG 12 (Mism.= 0)

Motifs on "-" Strand: Mean Exp. Number 0.00979 Up.Conf.Int. 1 Found 1  
21 GCATGCAA 14 (Mism.= 1)

Motifs on "-" Strand: Mean Exp. Number 0.00192 Up.Conf.Int. 1 Found 1  
177 TAGTACAC 170 (Mism.= 0)

**A total of 7 different REs were found**

***OeSRP cv. Leccino 5'***

|                                        |                |              |   |       |   |
|----------------------------------------|----------------|--------------|---|-------|---|
| Motifs on "-" Strand: Mean Exp. Number | 0.00451        | Up.Conf.Int. | 1 | Found | 1 |
| 20 CATGCAA                             | 14 (Mism.= 0)  |              |   |       |   |
| Motifs on "-" Strand: Mean Exp. Number | 0.00984        | Up.Conf.Int. | 1 | Found | 1 |
| 51 TCCGTGTtCA                          | 41 (Mism.= 2)  |              |   |       |   |
| Motifs on "-" Strand: Mean Exp. Number | 0.00267        | Up.Conf.Int. | 1 | Found | 1 |
| 190 TTTTTTGTGGGTTTTT                   | 175 (Mism.= 3) |              |   |       |   |
| Motifs on "+" Strand: Mean Exp. Number | 0.00590        | Up.Conf.Int. | 1 | Found | 1 |
| 3 CCAAATTTG                            | 12 (Mism.= 1)  |              |   |       |   |
| Motifs on "+" Strand: Mean Exp. Number | 0.00188        | Up.Conf.Int. | 1 | Found | 1 |
| 3 CCAAATTTG                            | 12 (Mism.= 0)  |              |   |       |   |
| Motifs on "-" Strand: Mean Exp. Number | 0.00198        | Up.Conf.Int. | 1 | Found | 1 |
| 173 TAGTACAC                           | 166 (Mism.= 0) |              |   |       |   |

**A total of 6 different REs were found**

**Figure S1:** The amino acid changes and their position in the five out of ten studied genes.

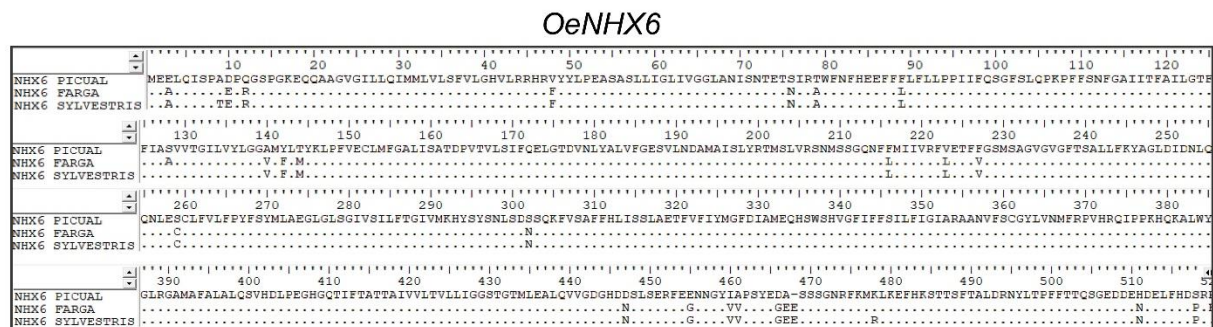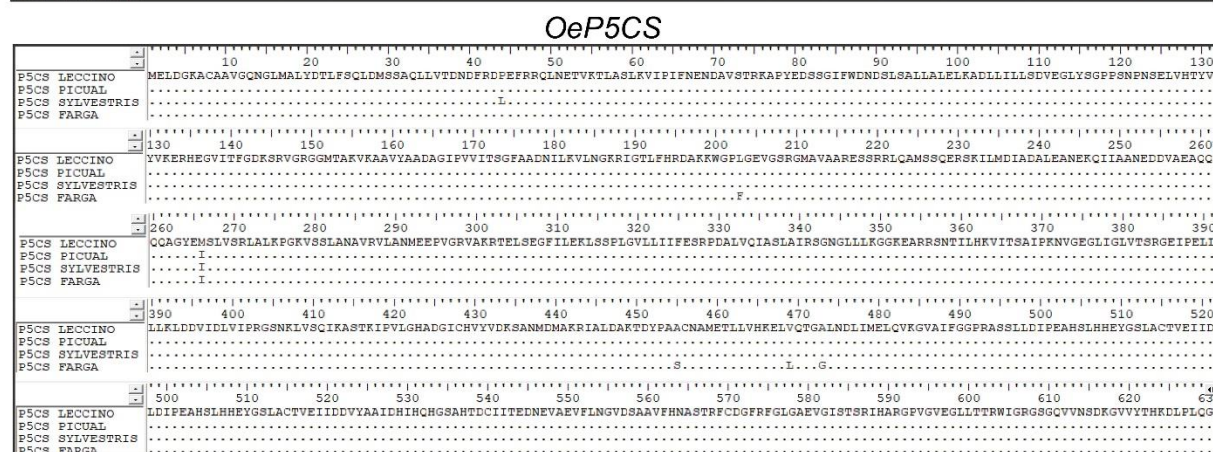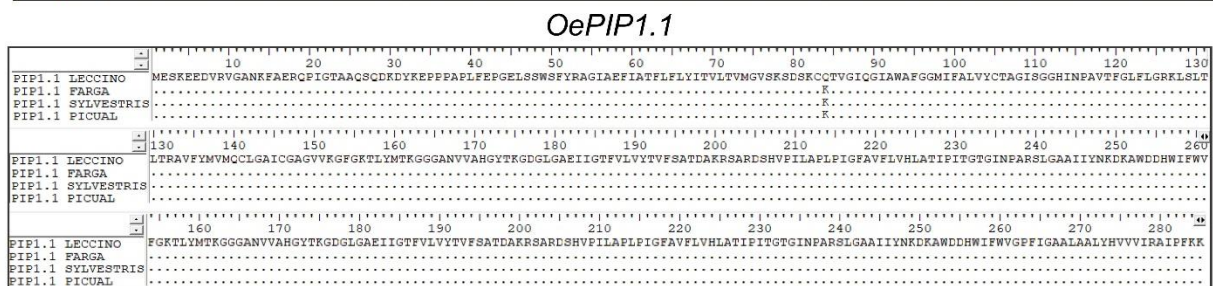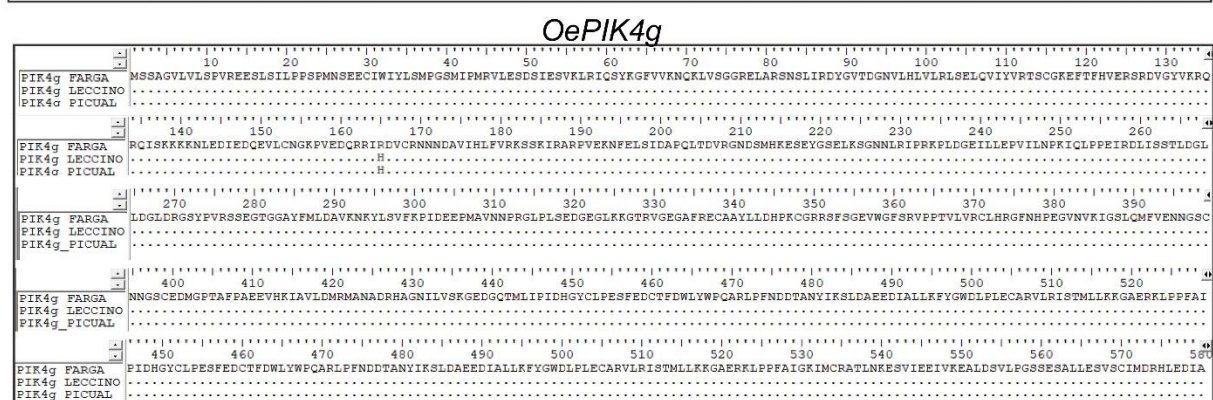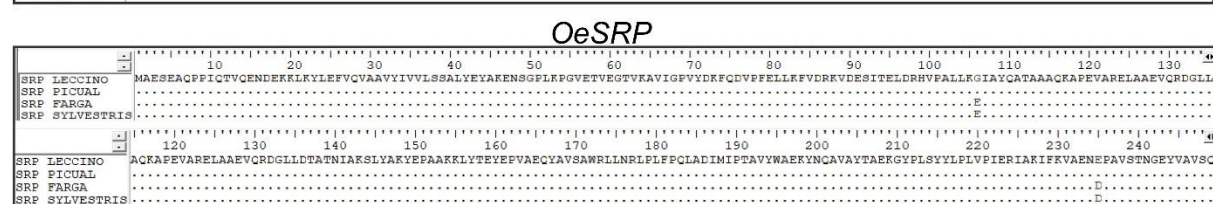

Supplement: s1 [file s1]
